# Supplementary material for: Alternative splicing engineering modulation of thermal/electrical transmission properties in low-dimensional nanodevices based on five-carbon ring structures
Source: Royal Society of Chemistry journal article supplement (doi:10.1039/d4cp04772a), 2025-01-01
Supplement: d4cp04772a2.pdf [file d4cp04772a2.pdf]

## Supporting Information For

### **Alternative splicing engineering modulation on thermal/electrical transmission property of low-dimensional nanodevices based on five-carbon ring structure**

**Meng Qian, Bei Zhang\***

*Xinjiang Key Laboratory of Solid State Physics and Devices, School of Physics Science and Technology, Xinjiang University, Urumqi, Xinjiang 830046, China*

\*Corresponding author: B. Zhang

E-Mail address: [zhb@xju.edu.cn](mailto:zhb@xju.edu.cn)

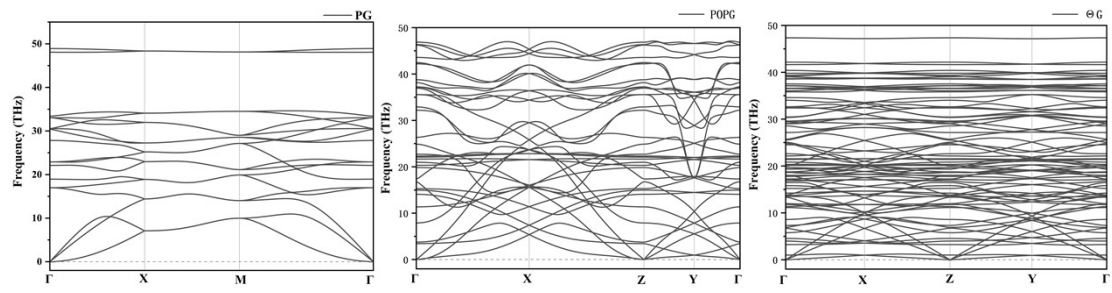

Fig.S1 Phonon band structures of (a) PG (b) POPG and (c)  $\Theta$ G
